# Supplementary material for: Enhanced performance of a dye-sensitized solar cell with the incorporation of titanium carbide in the TiO2 matrix
Source: Royal Society of Chemistry journal article supplement (doi:10.1039/b923477b), 2010-01-01
Supplement: b923477b.pdf [file b923477b.pdf]

**Supporting Information for**  
**Enhanced Performance of a Dye-sensitized Solar Cell with**  
**the Incorporation of Titanium Carbide in the TiO<sub>2</sub> Matrix**

**Chuan-Pei Lee,<sup>a</sup> Po-Yen Chen,<sup>a</sup> R.Vittal<sup>a</sup> and Kuo-Chuan Ho<sup>\*a,b</sup>**

**Figure S1** EDX data corresponding to TiC films, (a) before and (b) after thermal treatment of TiC at 450 °C.

**Figure S2** Photocurrent-voltage curves of three DSSCs, (a) without TiC (Cell A, B and C) and (b) with 3 wt% of TiC (Cell A', B' and C').

**Figure S3** Transmittance spectra of TiO<sub>2</sub> films with various weight percentages of TiC.

**Figure S4** Transient photo-current curves of the DSSCs with 3 wt% TiC (dotted line) and without any TiC (solid line) in their TiO<sub>2</sub> films.

**Table S1** Photovoltaic parameters of three DSSCs, each cell with 0 wt% of TiC (Cell A, B and C) and with 3wt% of TiC (Cell A', B' and C').

(a)

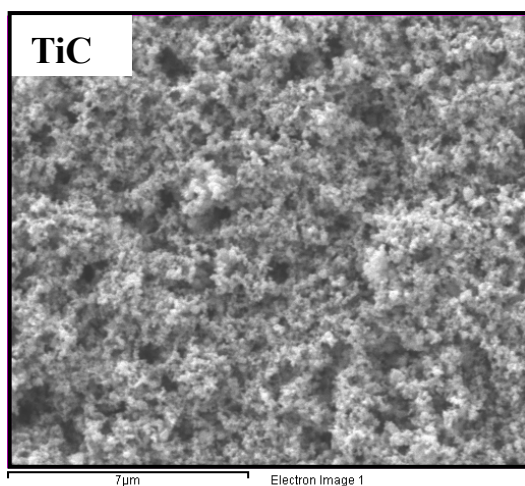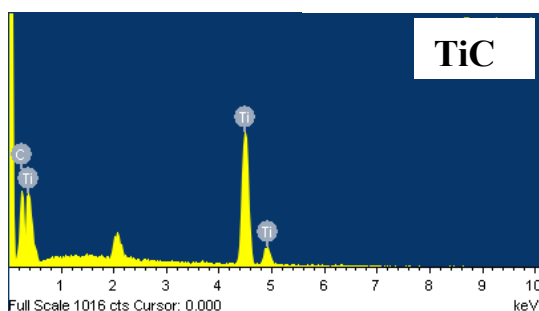

| Element | Weight% | Atomic% |
|---------|---------|---------|
| C       | 13.30   | 37.95   |
| Ti      | 86.70   | 62.05   |
| Total   | 100.00  |         |

(b)

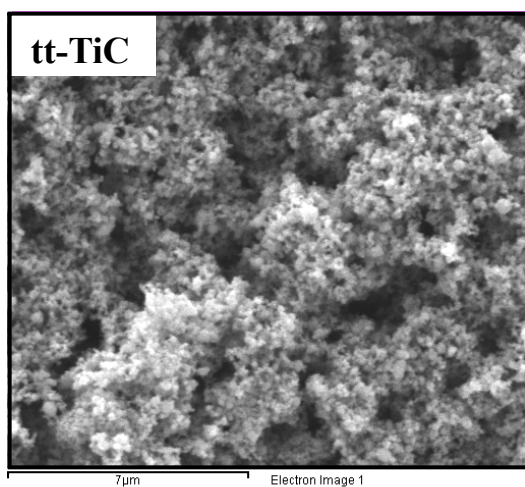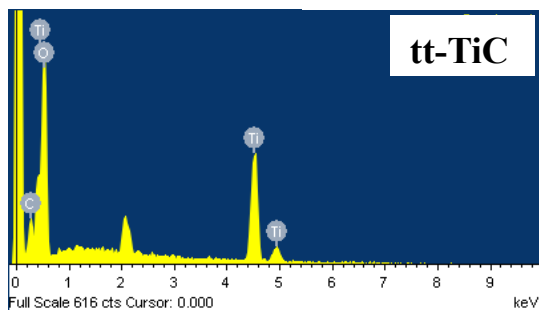

| Element | Weight% | Atomic% |
|---------|---------|---------|
| C       | 5.18    | 9.95    |
| O       | 46.28   | 66.69   |
| Ti      | 48.54   | 23.36   |
| Total   | 100.00  |         |

Figure S1

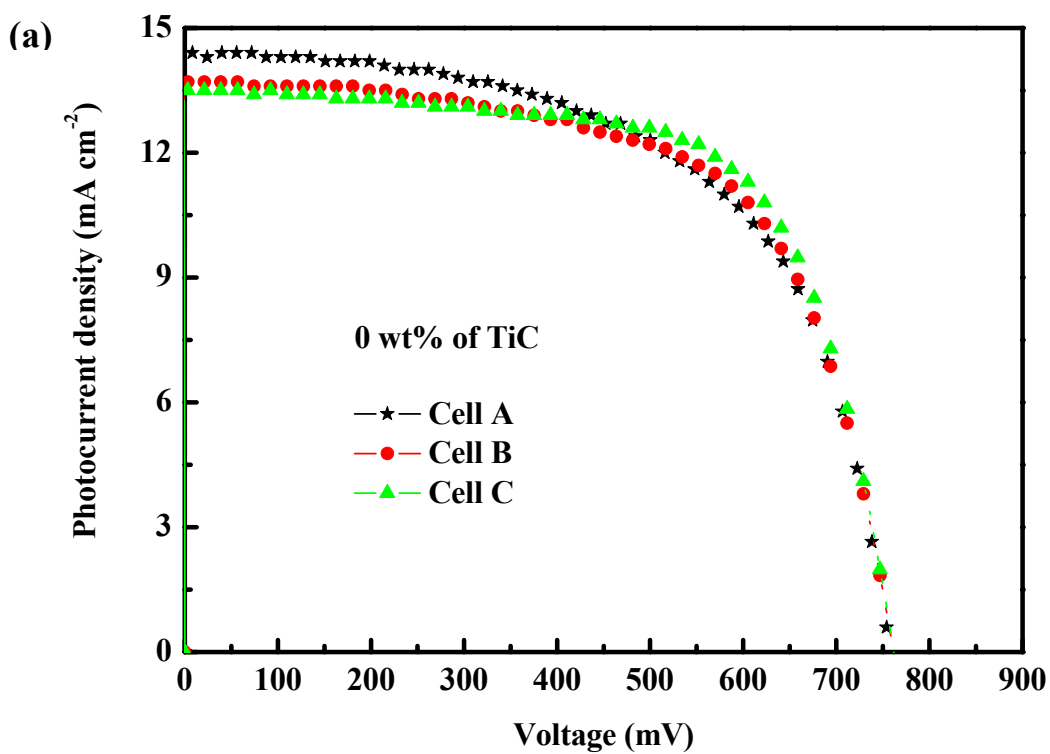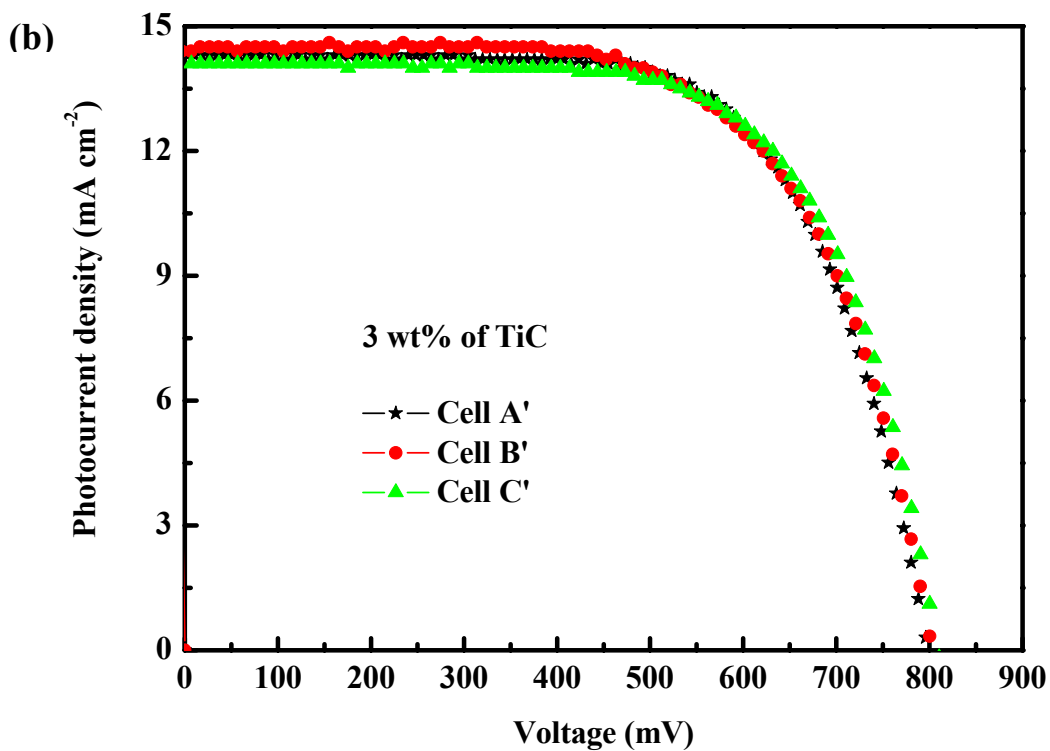

Figure S2

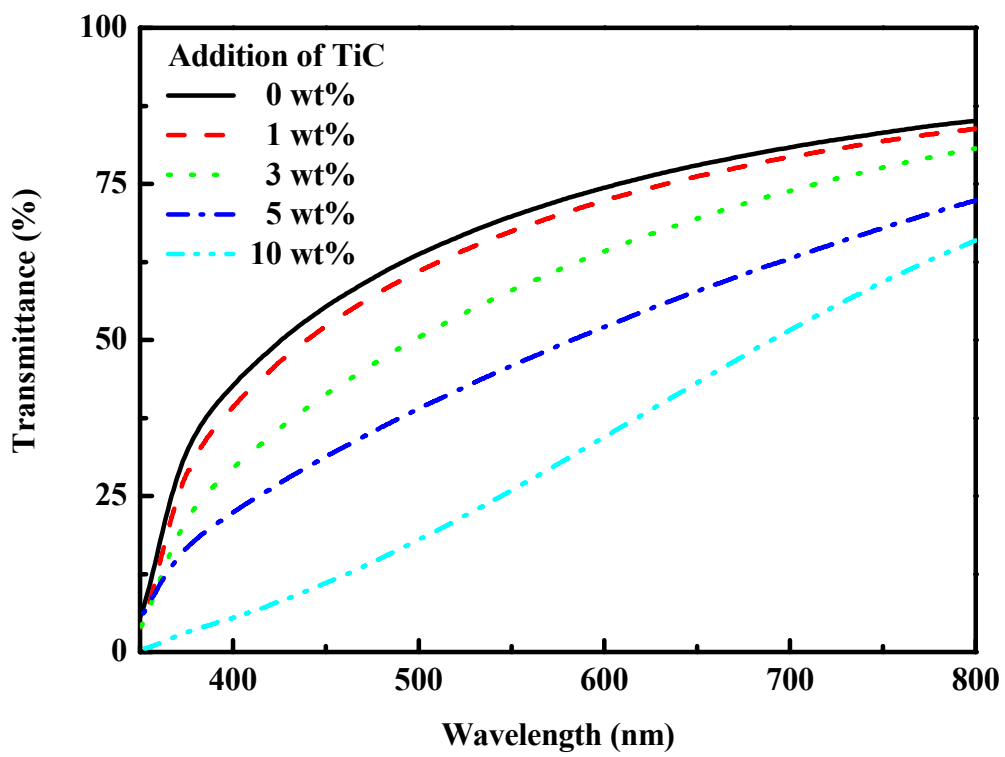

Figure S3

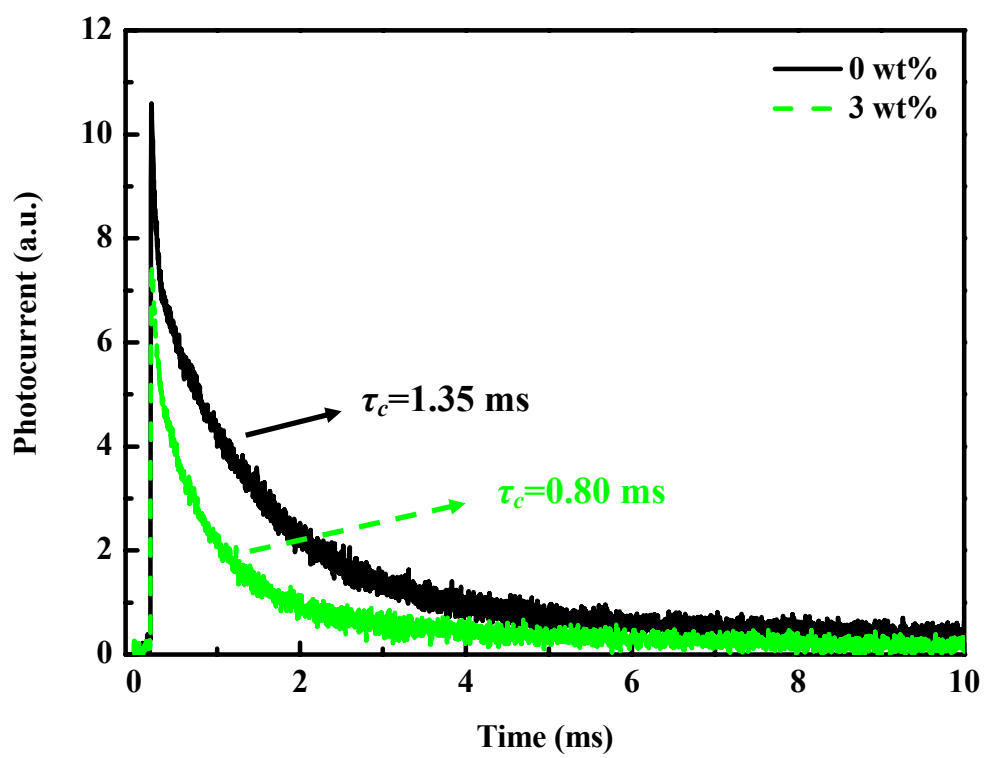

Figure S4

**Table S1**

| TiC content   | $V_{OC}$ (mV) | $FF$ | $J_{SC}$ (mA cm <sup>-2</sup> ) | $\eta$ (%) |
|---------------|---------------|------|---------------------------------|------------|
| 0 wt% Cell A  | 756           | 0.59 | 14.40                           | 6.39       |
| 0 wt% Cell B  | 760           | 0.63 | 13.71                           | 6.60       |
| 0 wt% Cell C  | 760           | 0.66 | 13.50                           | 6.85       |
| average       | 759           | 0.63 | 13.87                           | 6.61       |
| 3 wt% Cell A' | 798           | 0.66 | 14.30                           | 7.56       |
| 3 wt% Cell B' | 802           | 0.65 | 14.40                           | 7.48       |
| 3 wt% Cell C' | 808           | 0.67 | 14.10                           | 7.64       |
| average       | 803           | 0.66 | 14.30                           | 7.56       |
